# Supplementary material for: Fecal Carriage of Escherichia coli Harboring the tet(X4)-IncX1 Plasmid from a Tertiary Class-A Hospital in Beijing, China
Source: MDPI journal article supplement (doi:10.3390/antibiotics11081068), 2022-08-06
Supplement: s1 [file s1]

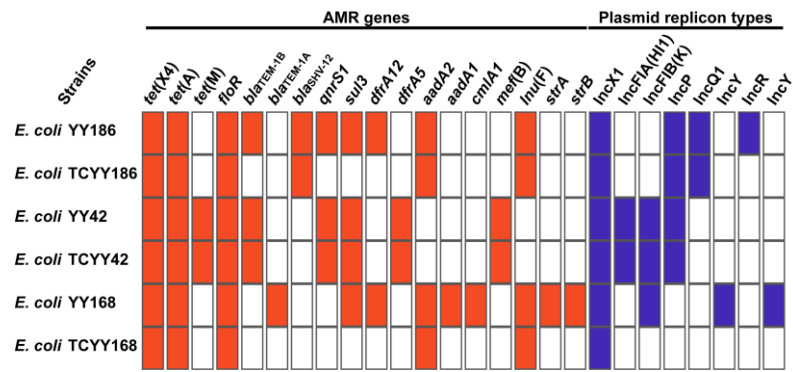

**Figure S1.** Distribution of antimicrobial-resistance genes and plasmid-replicon types among three *E. coli* isolates and their transconjugants.

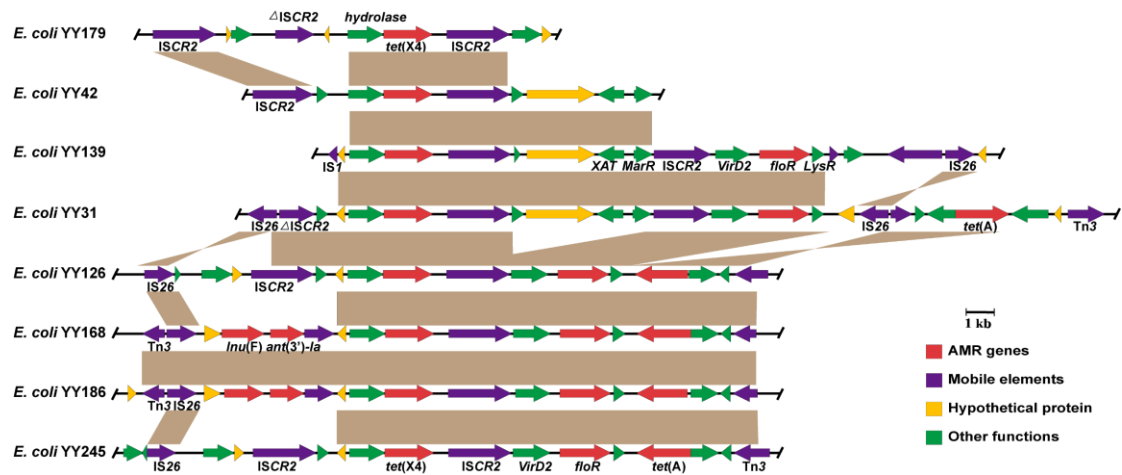

**Figure S2.** Characterization of *tet(X4)*-bearing genetic environments in eight isolates. Arrows indicate the positions and directions of the genes. Regions with >99% homology are shaded in brown. The  $\Delta$  symbol indicates a truncated gene.

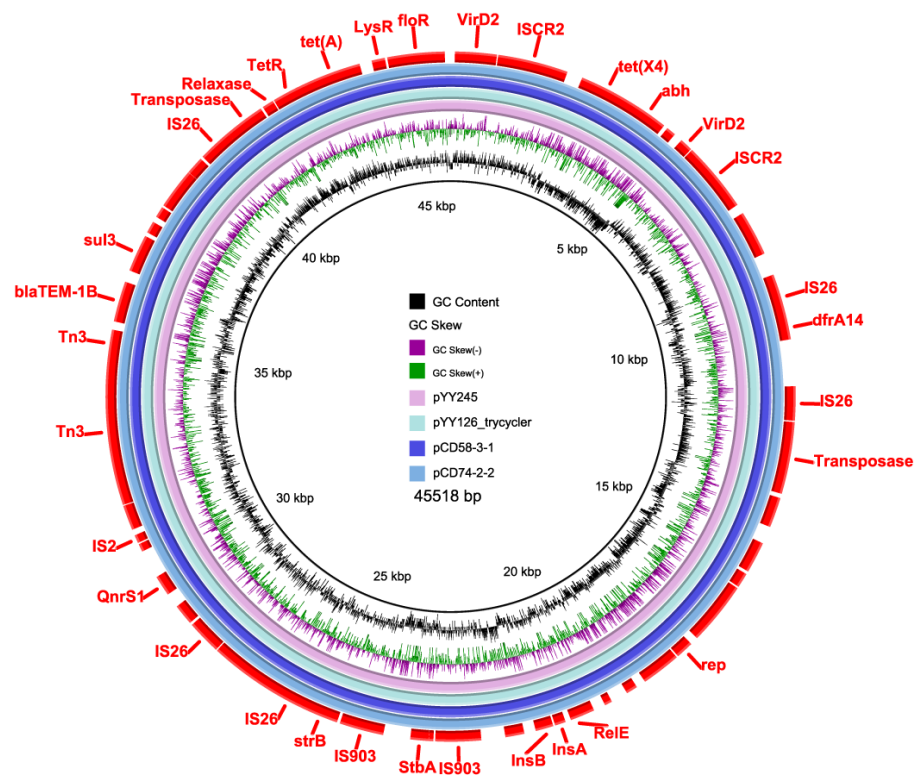

**Figure S3** Circular comparison of *tet(X4)*-bearing IncX1 plasmid, pYY245.
