# Supplementary material for: Fecal Carriage of Escherichia coli Harboring the tet(X4)-IncX1 Plasmid from a Tertiary Class-A Hospital in Beijing, China
Source: Antibiotics (Basel). 2022 Aug 6;11(8):1068. doi: 10.3390/antibiotics11081068 (PMC9405050; doi:10.3390/antibiotics11081068)
Supplement: Supplementary file 1 [file antibiotics-11-01068-s001.zip › Supplemental fileTable.xlsx]

## Sheet: Table S1
Table S1 MICs of eight tet(X4)-positive isolates and three transconjugants
Strain ID	Description	Department	Gender	Date	MIC
					AMP	TGC	DOX	FFC	SXT	GEN	CQN	AMC	CIP	LVX	MEM	PB
YY176	isolate	Nephrology	male	2019-08	>32	>8	>16	>16	>8	>16	4	8	2	4	≤0.12	≤0.5
YY245	isolate	hepatology	female	2019-09	>32	>8	>16	>16	>8	≤1	≤0.5	16	0.5	1	≤0.12	≤0.5
YY139	isolate	Hepatology	male	2019-08	>32	>8	>16	>16	>8	≤1	≤0.5	8	>4	>8	≤0.12	≤0.5
YY126	isolate	Oncology	male	2019-09	>32	>8	>16	>16	>8	≤1	≤0.5	16	0.5	0.5	≤0.12	≤0.5
YY31	isolate	Oncology	male	2019-08	>32	>8	>16	>16	8	≤1	≤0.5	8	0.25	1	≤0.12	≤0.5
YY186	isolate	Oncology	female	2019-08	>32	>8	>16	>16	>8	≤1	2	16	0.5	0.5	≤0.12	≤0.5
YY42	isolate	Urology	male	2019-06	>32	>8	>16	>16	>8	≤1	≤0.5	32	0.5	1	≤0.12	≤0.5
YY168	isolate	General surgery	male	2019-08	>32	>8	>16	>16	>8	≤1	≤0.5	16	≤0.06	≤0.06	≤0.12	≤0.5
TCYY168	Transconjugant	-	-	-	4	>8	>16	>16	≤0.25	≤1	≤0.5	4	≤0.06	0.12	≤0.12	≤0.5
TCYY186	Transconjugant	-	-	-	>32	>8	>16	>16	≤0.25	≤1	1	4	≤0.06	≤0.06	≤0.12	≤0.5
TCYY42	Transconjugant	-	-	-	>32	>8	>16	>16	>8	≤1	≤0.5	32	0.5	1	≤0.12	≤0.5

## Sheet: Table S2
Table S2 Pairwise SNP distance matrix for eight tet(X4)-positive isolates
Strain ID	YY245	YY31	YY42	YY126	YY168	YY139	YY176	YY186
YY245	0	32165	32154	15	23680	33698	47413	32950
YY31	32165	0	39	32160	32965	28904	49573	29546
YY42	32154	39	0	32149	32954	28893	49566	29535
YY126	15	32160	32149	0	23675	33695	47408	32947
YY168	23680	32965	32954	23675	0	35861	47878	33638
YY139	33698	28904	28893	33695	35861	0	43800	34415
YY176	47413	49573	49566	47408	47878	43800	0	46912
YY186	32950	29546	29535	32947	33638	34415	46912	0

## Sheet: Table S3
Table S3 Information of 1101 fecal samples
Date	Numers of samples	Numers of tet(X4)-positive isolates
2019.06	244	1
2019.07	287	0
2019.08	295	5
2019.09	275	2

## Sheet: Table S4
Table S4 Information of eight tet(X4)-positive E. coli and two-hundred and seventy-two online tet(X4)-positive E. coli genomes
Number	Strain ID/Accession	Source	Country	Sequence type	BioProject
1	YY42	human	China	ST761	PRJNA846553
2	YY31	human	China	ST761	PRJNA846553
3	YY168	human	China	ST6466	PRJNA846553
4	YY245	human	China	ST361	PRJNA846553
5	YY126	human	China	ST361	PRJNA846553
6	YY186	human	China	ST8059	PRJNA846553
7	YY176	human	China	ST877	PRJNA846553
8	YY139	human	China	ST44	PRJNA846553
9	GCA_013077305.1	environment	Thailand	ST1056	PRJEB11403
10	GCA_013077385.1	environment	Thailand	ST165	PRJEB11403
11	GCA_013077765.1	environment	Thailand	ST5946	PRJEB11403
12	ERR1617900	human	Netherlands	ST10	PRJEB15226
13	ERR1618134	human	Netherlands	ST10	PRJEB15226
14	ERR4220797	animal	Thailand	ST10	PRJEB38313
15	ERR4220812	animal	Thailand	ST10	PRJEB38313
16	ERR4220873	animal	Thailand	ST773	PRJEB38313
17	ERR4221004	animal	Thailand	ST10	PRJEB38313
18	ERR4220700	human	Thailand	ST906	PRJEB38313
19	ERR4220846	human	Thailand	ST641	PRJEB38313
20	ERR4220885	human	Thailand	ST48	PRJEB38313
21	ERR4220941	human	Thailand	ST10	PRJEB38313
22	ERR4221124	human	Thailand	ST685	PRJEB38313
23	ERR4221082	human	Thailand	ST515	PRJEB38313
24	ERR4221084	human	Thailand	ST515	PRJEB38313
25	ERR4220870	human	Thailand	ST773	PRJEB38313
26	ERR4221005	human	Thailand	ST10	PRJEB38313
27	GCA_002246085.1	animal	Thailand	ST206	PRJNA389557
28	GCA_002247815.1	animal	Thailand	ST10	PRJNA389557
29	GCA_002248015.1	animal	Thailand	ST165	PRJNA389557
30	GCA_002246485.2	human	Thailand	ST224	PRJNA389557
31	GCA_012297045.1	human	Singapore	ST10464	PRJNA476828
32	GCA_014657275.1	human	Malaysia	ST1193	PRJNA488345
33	GCA_014117655.1	human	Thailand	ST410	PRJNA525849
34	GCA_014117545.1	human	Thailand	ST10	PRJNA525849
35	GCA_004924255.1	animal	China	ST542	PRJNA526123
36	GCA_004924275.1	animal	China	ST515	PRJNA526123
37	GCA_004924355.1	animal	China	ST1196	PRJNA528364
38	GCA_007352595.1	animal	China	ST641	PRJNA531750
39	GCA_007352605.1	animal	China	ST6833	PRJNA531750
40	GCA_007352615.1	animal	China	ST1196	PRJNA531750
41	GCA_005145955.1	human	Thailand	ST617	PRJNA532291
42	GCA_004831135.1	human	Thailand	ST617	PRJNA532291
43	GCA_004831195.1	human	Thailand	ST617	PRJNA532291
44	GCA_009684135.1	human	USA	ST-unkonwn	PRJNA544527
45	GCA_009680875.1	human	USA	ST73	PRJNA544527
46	GCA_013415505.1	animal	China	ST155	PRJNA545593
47	GCA_008080655.1	animal	China	ST48	PRJNA547507
48	GCA_011691525.1	animal	China	ST761	PRJNA548414
49	GCA_012278675.1	animal	China	ST761	PRJNA551552
50	GCA_008807135.1	animal derived food	China	ST10	PRJNA553293
51	GCA_008807155.1	animal derived food	China	ST761	PRJNA553293
52	GCA_008807295.1	animal derived food	China	ST761	PRJNA553293
53	GCA_009738145.1	environment	China	ST206	PRJNA576562
54	GCA_009671045.1	animal	China	ST641	PRJNA588380
55	GCA_009671085.1	animal	China	ST761	PRJNA588383
56	GCA_009671105.1	animal	China	ST8165	PRJNA588384
57	GCA_009671125.1	animal	China	ST7131	PRJNA588386
58	GCA_011492985.1	animal	China	ST48	PRJNA594788
59	GCA_014219545.1	human	China	ST48	PRJNA595705
60	GCA_014219485.1	human	China	ST761	PRJNA595705
61	GCA_014219525.1	human	China	ST761	PRJNA595705
62	GCA_014219555.1	human	China	ST6730	PRJNA595705
63	GCA_011045875.1	animal	China	ST10170	PRJNA599268
64	GCA_011045895.1	animal	China	ST10170	PRJNA599302
65	GCA_009905135.1	human	Singapore	ST156	PRJNA599529
66	GCA_009905115.1	human	Singapore	ST4977	PRJNA599529
67	GCA_014522225.1	human	China	ST773	PRJNA608094
68	GCA_011492885.1	animal	China	ST7366	PRJNA609210
69	GCA_014075335.1	animal	China	ST10776	PRJNA610125
70	GCA_014075475.1	animal	China	ST7187	PRJNA610125
71	GCA_014075595.1	animal	China	ST7366	PRJNA610125
72	GCA_014075795.1	animal	China	ST48	PRJNA610125
73	GCA_014075915.1	animal	China	ST48	PRJNA610125
74	GCA_011605105.1	animal	China	ST1638	PRJNA612662
75	GCA_011605135.1	animal	China	ST195	PRJNA612670
76	GCA_011605115.1	animal	China	ST195	PRJNA612672
77	GCA_011605145.1	animal	China	ST1196	PRJNA612673
78	GCA_011605175.1	animal	China	ST10	PRJNA612674
79	GCA_011605245.1	animal	China	ST1196	PRJNA612684
80	GCA_011605215.1	animal	China	ST1196	PRJNA612686
81	GCA_011605255.1	animal	China	ST515	PRJNA612715
82	GCA_011605285.1	animal	China	ST195	PRJNA612716
83	GCA_011604865.1	animal	China	ST195	PRJNA612719
84	GCA_011605385.1	animal	China	ST761	PRJNA612724
85	GCA_011605025.1	animal	China	ST1112	PRJNA612726
86	GCA_011604845.1	animal	China	ST641	PRJNA612730
87	GCA_011787945.1	animal	China	ST761	PRJNA612741
88	GCA_011605085.1	animal	China	ST761	PRJNA612742
89	GCA_011604925.1	animal	China	ST761	PRJNA612746
90	GCA_011605015.1	animal	China	ST641	PRJNA612749
91	GCA_011605005.1	environment	China	ST10671	PRJNA612751
92	GCA_011604965.1	environment	China	ST1638	PRJNA612752
93	GCA_011604975.1	animal	China	ST761	PRJNA612753
94	GCA_011604935.1	animal	China	ST761	PRJNA612755
95	GCA_011605035.1	environment	China	ST48	PRJNA612756
96	GCA_011605395.1	environment	China	ST1196	PRJNA612758
97	GCA_011605415.1	environment	China	ST641	PRJNA612759
98	GCA_012102865.1	animal	China	ST10170	PRJNA616426
99	GCA_012370835.1	animal	China	ST761	PRJNA624019
100	GCA_012370855.1	animal	China	ST761	PRJNA624019
101	GCA_012371425.1	animal	China	ST761	PRJNA624019
102	GCA_012371475.1	animal	China	ST761	PRJNA624019
103	GCA_014528325.1	animal	China	ST744	PRJNA625924
104	GCA_014528265.1	animal	China	ST10	PRJNA625924
105	GCA_014528195.1	animal	China	ST48	PRJNA625924
106	GCA_014529325.1	animal	China	ST10	PRJNA625924
107	GCA_014529315.1	animal	China	ST2345	PRJNA625924
108	GCA_014529095.1	animal	China	ST2035	PRJNA625924
109	GCA_014527835.1	animal	China	ST48	PRJNA625924
110	GCA_014527905.1	animal	China	ST1602	PRJNA625924
111	GCA_014527855.1	animal	China	ST4429	PRJNA625924
112	GCA_014529155.1	animal	China	ST189	PRJNA625924
113	GCA_014527735.1	animal	China	ST6704	PRJNA625924
114	GCA_014529125.1	animal	China	ST1602	PRJNA625924
115	GCA_014527805.1	animal	China	ST48	PRJNA625924
116	GCA_014528045.1	animal	China	ST189	PRJNA625924
117	GCA_014528005.1	animal	China	ST189	PRJNA625924
118	GCA_014527935.1	animal	China	ST1602	PRJNA625924
119	GCA_014529085.1	animal	China	ST2035	PRJNA625924
120	GCA_014527925.1	animal	China	ST8540	PRJNA625924
121	GCA_014527695.1	animal	China	ST1602	PRJNA625924
122	GCA_014527685.1	animal	China	ST2035	PRJNA625924
123	GCA_014527725.1	animal	China	ST6704	PRJNA625924
124	GCA_014527785.1	animal	China	ST877	PRJNA625924
125	GCA_014527745.1	animal	China	ST877	PRJNA625924
126	GCA_014527825.1	animal	China	ST2035	PRJNA625924
127	GCA_014527845.1	animal	China	ST48	PRJNA625924
128	GCA_014529185.1	animal	China	ST2035	PRJNA625924
129	GCA_014529285.1	animal	China	ST10392	PRJNA625924
130	GCA_014528175.1	animal	China	ST6704	PRJNA625924
131	GCA_014529205.1	animal	China	ST2035	PRJNA625924
132	GCA_014528115.1	animal	China	ST2035	PRJNA625924
133	GCA_014528165.1	animal	China	ST6704	PRJNA625924
134	GCA_014528065.1	animal	China	ST2035	PRJNA625924
135	GCA_014529255.1	animal	China	ST2035	PRJNA625924
136	GCA_014528075.1	animal	China	ST2035	PRJNA625924
137	GCA_014528135.1	animal	China	ST6704	PRJNA625924
138	GCA_014528185.1	animal	China	ST877	PRJNA625924
139	GCA_014528105.1	animal	China	ST6704	PRJNA625924
140	GCA_014529145.1	animal	China	ST2035	PRJNA625924
141	GCA_014529245.1	animal	China	ST10392	PRJNA625924
142	GCA_014529195.1	animal	China	ST2035	PRJNA625924
143	GCA_014528545.1	animal	China	ST6704	PRJNA625924
144	GCA_014528945.1	animal	China	ST48	PRJNA625924
145	GCA_014528705.1	animal	China	ST1602	PRJNA625924
146	GCA_014527585.1	animal	China	ST4429	PRJNA625924
147	GCA_014528775.1	animal	China	ST1602	PRJNA625924
148	GCA_014527535.1	animal	China	ST6704	PRJNA625924
149	GCA_014527635.1	animal	China	ST746	PRJNA625924
150	GCA_014527545.1	animal	China	ST6704	PRJNA625924
151	GCA_014528745.1	animal	China	ST6704	PRJNA625924
152	GCA_014528625.1	animal	China	ST48	PRJNA625924
153	GCA_014529055.1	animal	China	ST48	PRJNA625924
154	GCA_014528935.1	animal	China	ST877	PRJNA625924
155	GCA_014528595.1	animal	China	ST6704	PRJNA625924
156	GCA_014528515.1	animal	China	ST6704	PRJNA625924
157	GCA_014527595.1	animal	China	ST10392	PRJNA625924
158	GCA_014527625.1	animal	China	ST6704	PRJNA625924
159	GCA_014528755.1	animal	China	ST6704	PRJNA625924
160	GCA_014528785.1	animal	China	ST48	PRJNA625924
161	GCA_014528985.1	animal	China	ST877	PRJNA625924
162	GCA_014528925.1	animal	China	ST877	PRJNA625924
163	GCA_014528835.1	animal	China	ST877	PRJNA625924
164	GCA_014528655.1	animal	China	ST6704	PRJNA625924
165	GCA_014528675.1	animal	China	ST6704	PRJNA625924
166	GCA_014528535.1	animal	China	ST6704	PRJNA625924
167	GCA_014529025.1	animal	China	ST48	PRJNA625924
168	GCA_014528585.1	animal	China	ST6704	PRJNA625924
169	GCA_014528645.1	animal	China	ST6704	PRJNA625924
170	GCA_014527645.1	animal	China	ST29	PRJNA625924
171	GCA_014528725.1	animal	China	ST6704	PRJNA625924
172	GCA_014528965.1	animal	China	ST877	PRJNA625924
173	GCA_014528335.1	animal	China	ST2035	PRJNA625924
174	GCA_014527955.1	animal	China	ST1602	PRJNA625924
175	GCA_014528465.1	animal	China	ST1602	PRJNA625924
176	GCA_014527525.1	animal	China	ST1437	PRJNA625924
177	GCA_014528385.1	animal	China	ST6704	PRJNA625924
178	GCA_014528365.1	animal	China	ST6704	PRJNA625924
179	GCA_014528025.1	animal	China	ST877	PRJNA625924
180	GCA_014528505.1	animal	China	ST6704	PRJNA625924
181	GCA_014528865.1	animal	China	ST1602	PRJNA625924
182	GCA_014528425.1	animal	China	ST6704	PRJNA625924
183	GCA_014528855.1	animal	China	ST1602	PRJNA625924
184	GCA_014528405.1	animal	China	ST6704	PRJNA625924
185	GCA_014528475.1	animal	China	ST6704	PRJNA625924
186	GCA_014528305.1	animal	China	ST10392	PRJNA625924
187	GCA_014529045.1	animal	China	ST877	PRJNA625924
188	GCA_014528415.1	animal	China	ST6704	PRJNA625924
189	GCA_014528275.1	animal	China	ST1602	PRJNA625924
190	GCA_014528825.1	animal	China	ST877	PRJNA625924
191	GCA_014528905.1	animal	China	ST48	PRJNA625924
192	GCA_014527975.1	animal	China	ST48	PRJNA625924
193	GCA_014528235.1	animal	China	ST761	PRJNA625924
194	GCA_014529305.1	animal	China	ST410	PRJNA625924
195	GCA_013375195.1	animal derived food	China	ST4656	PRJNA634220
196	GCA_013425935.1	animal derived food	China	ST10	PRJNA634220
197	GCA_013694345.1	animal derived food	China	ST4656	PRJNA634220
198	GCA_014904055.1	animal	China	ST716	PRJNA663118
199	GCA_014904075.1	animal	China	ST10	PRJNA663118
200	GCA_014904115.1	animal	China	ST218	PRJNA663118
201	GCA_014904135.1	animal	China	ST716	PRJNA663118
202	GCA_014904145.1	animal	China	ST641	PRJNA663118
203	GCA_014904175.1	animal	China	ST10115	PRJNA663118
204	GCA_014904185.1	animal	China	ST761	PRJNA663118
205	GCA_014904215.1	animal	China	ST716	PRJNA663118
206	GCA_014904235.1	animal	China	ST641	PRJNA663118
207	GCA_014904245.1	animal	China	ST761	PRJNA663118
208	GCA_014904265.1	animal	China	ST10115	PRJNA663118
209	GCA_014904275.1	animal	China	ST10115	PRJNA663118
210	GCA_014904315.1	animal	China	ST1421	PRJNA663118
211	GCA_014904325.1	animal	China	ST716	PRJNA663118
212	GCA_014904335.1	animal	China	ST716	PRJNA663118
213	GCA_014904355.1	animal	China	ST1421	PRJNA663118
214	GCA_014904375.1	animal	China	ST1421	PRJNA663118
215	GCA_014904415.1	animal	China	ST761	PRJNA663118
216	GCA_014904425.1	animal	China	ST716	PRJNA663118
217	GCA_014904435.1	animal	China	ST761	PRJNA663118
218	GCA_014904445.1	animal	China	ST716	PRJNA663118
219	GCA_014904455.1	animal	China	ST7450	PRJNA663118
220	GCA_014904515.1	animal	China	ST206	PRJNA663118
221	GCA_014904535.1	animal	China	ST761	PRJNA663118
222	GCA_014904545.1	animal	China	ST716	PRJNA663118
223	GCA_014904565.1	animal	China	ST10120	PRJNA663118
224	GCA_014904595.1	animal	China	ST761	PRJNA663118
225	GCA_014904605.1	animal	China	ST11255	PRJNA663118
226	GCA_014904635.1	animal	China	ST761	PRJNA663118
227	GCA_014904655.1	animal	China	ST761	PRJNA663118
228	GCA_014904665.1	animal	China	ST761	PRJNA663118
229	GCA_015730585.1	animal derived food	China	ST10	PRJNA665928
230	GCA_015730605.1	animal derived food	China	ST2144	PRJNA665928
231	GCA_015730615.1	animal derived food	China	ST195	PRJNA665928
232	GCA_015730625.1	animal derived food	China	ST789	PRJNA665928
233	GCA_015730685.1	animal derived food	China	ST789	PRJNA665928
234	GCA_015730705.1	animal derived food	China	ST10170	PRJNA665928
235	GCA_015730715.1	animal derived food	China	ST2064	PRJNA665928
236	GCA_015730725.1	animal derived food	China	ST2064	PRJNA665928
237	GCA_015730745.1	animal derived food	China	ST206	PRJNA665928
238	GCA_015730755.1	animal derived food	China	ST101	PRJNA665928
239	GCA_015730805.1	animal derived food	China	ST2144	PRJNA665928
240	GCA_015730815.1	animal derived food	China	ST1308	PRJNA665928
241	GCA_015730825.1	animal derived food	China	ST1196	PRJNA665928
242	GCA_015730835.1	animal derived food	China	ST795	PRJNA665928
243	GCA_015730885.1	animal derived food	China	ST642	PRJNA665928
244	GCA_015730905.1	animal derived food	China	ST195	PRJNA665928
245	GCA_015730925.1	animal derived food	China	ST2144	PRJNA665928
246	GCA_015730935.1	animal derived food	China	ST877	PRJNA665928
247	GCA_015730945.1	animal derived food	China	ST4704	PRJNA665928
248	GCA_015730955.1	animal derived food	China	ST58	PRJNA665928
249	GCA_015731005.1	animal derived food	China	ST165	PRJNA665928
250	GCA_015731015.1	animal derived food	China	ST295	PRJNA665928
251	GCA_015731045.1	animal derived food	China	ST195	PRJNA665928
252	GCA_015731065.1	animal derived food	China	ST165	PRJNA665928
253	GCA_015731105.1	animal derived food	China	ST761	PRJNA665928
254	GCA_015731145.1	animal derived food	China	ST10	PRJNA665928
255	GCA_015731165.1	animal derived food	China	ST10	PRJNA665928
256	GCA_015731185.1	animal derived food	China	ST10	PRJNA665928
257	GCA_015731195.1	animal derived food	China	ST641	PRJNA665928
258	GCA_015731225.1	animal derived food	China	ST58	PRJNA665928
259	GCA_015731245.1	animal derived food	China	ST515	PRJNA665928
260	GCA_015731265.1	animal derived food	China	ST195	PRJNA665928
261	GCA_015731315.1	animal derived food	China	ST641	PRJNA665928
262	GCA_015731345.1	animal derived food	China	ST4156	PRJNA665928
263	GCA_015731365.1	animal derived food	China	ST2064	PRJNA665928
264	GCA_015731385.1	animal derived food	China	ST58	PRJNA665928
265	GCA_015731405.1	animal derived food	China	ST48	PRJNA665928
266	GCA_015731415.1	animal derived food	China	ST6833	PRJNA665928
267	GCA_015731445.1	animal derived food	China	ST48	PRJNA665928
268	GCA_015731455.1	animal derived food	China	ST10	PRJNA665928
269	GCA_015731485.1	animal derived food	China	ST10	PRJNA665928
270	GCA_015731505.1	animal derived food	China	ST48	PRJNA665928
271	GCA_015731515.1	animal derived food	China	ST641	PRJNA665928
272	GCA_015731545.1	animal derived food	China	ST10	PRJNA665928
273	GCA_015731555.1	animal derived food	China	ST877	PRJNA665928
274	GCA_015731595.1	animal derived food	China	ST218	PRJNA665928
275	GCA_015731625.1	animal derived food	China	ST877	PRJNA665928
276	GCA_015731645.1	animal derived food	China	ST877	PRJNA665928
277	GCA_015731655.1	animal derived food	China	ST48	PRJNA665928
278	GCA_015731685.1	animal derived food	China	ST877	PRJNA665928
279	GCA_015731705.1	animal derived food	China	ST2035	PRJNA665928
280	GCA_015731725.1	animal derived food	China	ST540	PRJNA665928
